# Supplementary material for: CuO-multimetal ferrites for synergically boosting peroxydisulfate activation and decontamination by adsorption and oxidation mechanisms
Source: Royal Society of Chemistry journal article supplement (doi:10.1039/d5ta04115e), 2026-01-01
Supplement: d5ta04115e1.pdf [file d5ta04115e1.pdf]

**Supporting Information for**

**CuO-multimetal ferrites for synergically boosting peroxydisulfate  
activation and decontamination by adsorption and oxidation  
mechanisms**

Zeynab Fadaei<sup>1,2</sup>, Nadali Alavi<sup>1,2,\*</sup>, Babak Kakavandi<sup>3,\*</sup>, Abbas Shahsavani<sup>1,2</sup>, Mohsen Sadani<sup>1,2</sup>,  
Yueping Bao<sup>4,\*</sup>, Rasool Pelalak<sup>5,6,\*</sup>

<sup>1</sup> Environmental and Occupational Hazards Control Research Center, Shahid Beheshti University of Medical Sciences, Tehran, Iran

<sup>2</sup> Department of Environmental Health Engineering, School of Public Health and Safety, Shahid Beheshti University of Medical Sciences, Tehran, Iran

<sup>3</sup> Department of Environmental Health Engineering, Alborz University of Medical Sciences, Karaj, Iran

<sup>4</sup> MOE Key Laboratory of Pollution Processes and Environmental Criteria, College of Environmental Science and Engineering, Nankai University, 300350 Tianjin, China

<sup>5</sup> Institute of Research and Development, Duy Tan University, Da Nang, Vietnam

<sup>6</sup> School of Engineering & Technology, Duy Tan University, Da Nang, Vietnam.

**\* Corresponding authors:**

Environmental and Occupational Hazards Control Research Center, Shahid Beheshti University of Medical Sciences, Tehran, Iran. [alavi@sbmu.ac.ir](mailto:alavi@sbmu.ac.ir) (N. Alavi)

Department of Environmental Health Engineering, Alborz University of Medical Sciences, Karaj, Iran. [kakavandibvch@gmail.com](mailto:kakavandibvch@gmail.com) (B. Kakavandi).

College of Environmental Science and Engineering, Nankai University, 300350 Tianjin, China. [yueping.bao@nankai.edu.cn](mailto:yueping.bao@nankai.edu.cn) (Y. Bao).

Institute of Research and Development, Duy Tan University, Da Nang, Vietnam. [rasoolpelalak@duytan.edu.vn](mailto:rasoolpelalak@duytan.edu.vn) (R. Pelalak).

### **Text S1**

Copper nitrate ( $\text{Cu}(\text{NO}_3)_2 \cdot 3\text{H}_2\text{O}$ ), ferric chloride hexahydrate ( $\text{FeCl}_3 \cdot 6\text{H}_2\text{O}$ ), copper chloride hydrate ( $\text{CuCl}_2 \cdot 2\text{H}_2\text{O}$ ), magnesium chloride ( $\text{MgCl}_2 \cdot 6\text{H}_2\text{O}$ ), sodium hydroxide (NaOH, 99%), potassium persulfate (PS,  $\text{K}_2\text{S}_2\text{O}_8$ ), ethanol (EtOH,  $\text{C}_2\text{H}_5\text{OH}$ ), acetonitrile, acetic acid, tert-butyl alcohol (TBA,  $\text{C}_4\text{H}_{10}\text{O}$ ), furfuryl alcohol (FFA), sodium azide (SA,  $\text{NaN}_3$ ), and sodium hydroxide (NaOH) were analytical grade, obtained from Sigma Aldrich, and used as received, without further purification. Deionized (DI) water was used throughout the experiments.

### **Text S2**

X-ray diffraction (XRD) was used to analyze the crystalline phase of all the all-prepared materials by using XRD Philips PW1730 PANalytical XPert Pro MPD, with Cu  $\text{K}\alpha$  radiation at a wavelength ( $\lambda = 1.5406 \text{ \AA}$ ) with  $2\theta$  range of  $10^\circ - 80^\circ$ . Field-emission scanning electron microscopy (SEM-EDS/JSM-6700F) equipped X-ray energy spectrum (EDS SAMX, SAMX, France) was used to characterize the external morphology and chemical elemental composition of as-synthesized catalysts. Meanwhile, an Energy-Dispersive X-ray (EDAX mapping was applied during FESEM analysis to evaluate the distribution of chemical elements. The nanostructure features of CuO and MMF nanoparticles in the MMF composite were investigated by using transmission electron microscopy (TEM, JEM-2100; Jeol; Japan). A Multi-point Brunner-Emmett-Teller analysis (ASAP; Micromeritics, USA) was used to determine the specific surface area and pore size of the synthesized MMF composite via the  $\text{N}_2$  adsorption-desorption isotherms collected with a Micromeritics ASAP 2020 system. The magnetic measurements were performed on a Vibrating Sample Magnetometer (VSM)

(Lakeshore 7304, USA) for MMF and MMFC catalysts. To explore the change in surface charge, the zeta potentials of the as-prepared catalyst were measured using a Zetasizer Nano ZS90 (UK) in the range of pH values 1.0-11.0.

### **Text S3**

Identification of the intermediary by-products was performed using a gas chromatograph coupled to a mass spectrometer (GC-MS-QP2010, SHIMADZU, Japan) using an NST 05 MS column (30 m x 0.25 mm x 0.25  $\mu$ m coating thickness) composed of 95% dimethyl polysiloxane and 5% diphenyl. Initially, an extraction procedure based on 3 x 20 mL of CH<sub>2</sub>Cl<sub>2</sub> was carried out in 40 mL of the CIP samples. In sequence, the combined organic layer was dried with anhydrous MgSO<sub>4</sub> and concentrated by Nitrogen gas at 25°C. The oven initial temperature was 55°C, which was kept constant for 3 min, followed by an increase of 25°C min<sup>-1</sup> until 300°C, then held for 6 min. The temperature of the injector and detector was 260°C, with an interface temperature of 240°C. The temperature of the ionization source was held at 250°C for the selection and quantification of the organic compounds. The equipment was adjusted to a voltage of 0.88 kV, generating an impact ionization of 70 eV for molecular fragmentation and production of ions in a mass/electric charge (m/z) field of 20 to 600 in order to identify the structure and determine the concentrations of the by-products in the samples. The structural configuration of the by-products is based on the NIST 08 library of the GC-MS-QP2010.

**Table S1.** Theoretical and experimental Wt% and At% values for EDS analysis on the MMFC composite.

| Elements of MMFC | Wt% value   |              | At% value        |              |
|------------------|-------------|--------------|------------------|--------------|
|                  | Theoretical | Experimental | Theoretical<br>l | Experimental |
| Mg               | 4.01        | 2.3          | 4.24             | 2.62         |
| O                | 26.77       | 32.3         | 28.26            | 63.57        |
| Fe               | 37.34       | 18.76        | 36.75            | 10.58        |
| Cu               | 31.8        | 46.9         | 30.7             | 23.23        |

**Table S2.** The crystalline parameters for catalysts.

| Samples | Space group | Lattice constant                       | Volume | Density | Site occupancy |        |        |        |      | Atom pair             | Bond length | Bond Angel |
|---------|-------------|----------------------------------------|--------|---------|----------------|--------|--------|--------|------|-----------------------|-------------|------------|
| CuO     | C12/c1      | a = 4.6890<br>b = 3.4253<br>c = 5.1320 | 81.28  | 6.50    |                | x      | y      | z      | occ  | Cu-O                  | 1.971       | 87.1       |
|         |             |                                        |        |         | Cu             | 0.25   | 0.25   | 0      | 1    |                       |             |            |
|         |             |                                        |        |         | O              | 0      | 0.3944 | 0.25   | 1    |                       |             |            |
| MMF     | C12/c1      | a = 4.7743<br>b = 3.4283<br>c = 5.2057 | 83.72  | 6.31    |                | x      | y      | z      | occ  | Cu-O                  | 1.983       | 86.9       |
|         |             |                                        |        |         | Cu             | 0.25   | 0.25   | 0      | 1    |                       |             |            |
|         |             |                                        |        |         | O              | 0      | 0.4184 | 0.25   | 1    |                       |             |            |
|         | Fd-3m       | a = 8.5280<br>b = 8.5280<br>c = 8.5280 | 620.20 | 5.09    |                | x      | y      | z      | Occ  | Cu1/<br>Mg1/<br>Fe1-O | 2.060       | 90.3       |
|         |             |                                        |        |         | Cu1            | 0      | 0      | 0      | 0.25 |                       |             |            |
|         |             |                                        |        |         | Fe1            | 0      | 0      | 0      | 0.50 |                       |             |            |
|         |             |                                        |        |         | Mg1            | 0      | 0      | 0      | 0.25 |                       |             |            |
|         |             |                                        |        |         | Cu2            | 0.6250 | 0.6250 | 0.6250 | 0.25 | Cu2/<br>Mg2/<br>Fe2-O | 1.890       | 88.7       |
|         |             |                                        |        |         | Fe2            | 0.6250 | 0.6250 | 0.6250 | 0.50 |                       |             |            |
|         |             |                                        |        |         | Mg2            | 0.6250 | 0.6250 | 0.6250 | 0.25 |                       |             |            |
|         |             |                                        |        |         | O              | 0.4038 | 0.4038 | 0.4038 | 1    |                       |             |            |
| MMFC    | C12/c1      | a = 4.7270<br>b = 3.4052<br>c = 5.1040 | 81.02  | 6.52    |                | x      | y      | z      | occ  | Cu-O                  | 1.984       | 86.5       |
|         |             |                                        |        |         | Cu             | 0.25   | 0.25   | 0      | 1    |                       |             |            |
|         |             |                                        |        |         | O              | 0      | 0.4187 | 0.25   | 1    |                       |             |            |
|         | Fd-3m       | a = 8.3810<br>b = 8.3810<br>c = 8.3810 | 588.7  | 4.82    |                | x      | y      | z      | Occ  | Cu1/<br>Mg1/<br>Fe1-O | 2.087       | 89.6       |
|         |             |                                        |        |         | Cu1            | 0      | 0      | 0      | 0.25 |                       |             |            |
|         |             |                                        |        |         | Fe1            | 0      | 0      | 0      | 0.50 |                       |             |            |
|         |             |                                        |        |         | Mg1            | 0      | 0      | 0      | 0.25 |                       |             |            |
|         |             |                                        |        |         | Cu2            | 0.6250 | 0.6250 | 0.6250 | 0.25 | Cu2/<br>Mg2/<br>Fe2-O | 1.901       | 88.2       |
|         |             |                                        |        |         | Fe2            | 0.6250 | 0.6250 | 0.6250 | 0.50 |                       |             |            |
|         |             |                                        |        |         | Mg2            | 0.6250 | 0.6250 | 0.6250 | 0.25 |                       |             |            |
|         |             |                                        |        |         | O              | 0.3976 | 0.3976 | 0.3976 | 1    |                       |             |            |

**Table S3.**

The textural characteristics of the as-fabricated catalysts.

| Sample | $S_{\text{BET}}$ (m <sup>2</sup> /g) | $V_t^a$ ( cm <sup>3</sup> /g) | $V_m^b$ ( cm <sup>3</sup> /g) | $D_p^c$ ( nm) | Pore structure |
|--------|--------------------------------------|-------------------------------|-------------------------------|---------------|----------------|
| CuO    | 12.8                                 | 0.138                         | 2.94                          | 43.36         | Mesopore       |
| MMF    | 0.366                                | 0.0074                        | 0.084                         | 81.52         | Macropore      |
| MMFC   | 13.22                                | 0.064                         | 3.038                         | 19.52         | Mesopore       |

**Table S4.**

The physicochemical properties of the water samples.

| Physicochemical parameters | Unit  | DI-W  | TW    | RW     | LW     | SWE    |
|----------------------------|-------|-------|-------|--------|--------|--------|
| pH                         | --    | 7.44  | 7.36  | 7.8    | 8.2    | 7.5    |
| Nitrate nitrogen           | mg/L  | 0.004 | 0.22  | 0.37   | 4.35   | 9.46   |
| Phosphate                  | mg/L  | 0.001 | 0.02  | 0.325  | 0.68   | 2.78   |
| Chloride                   | mg/L  | 0.003 | 298.7 | 1243.7 | 2785.6 | 1436.5 |
| Electrical conductivity    | mS/cm | 0.01  | ND    | 0.56   | 1.47   | 0.87   |
| TOC                        | mg/L  | 0.18  | 1.75  | 7.87   | 14.5   | 18.8   |
| COD                        | mg/L  | ND    | 1.04  | 18.6   | 25.85  | 44.65  |
| Suspended solids (SS)      | mg/L  | ND    | ND    | 2.55   | 3.84   | 9.65   |

| Products | (m/z)  | Molecular Formula                                              | Proposed Structure                                                                 | Retention Time (min) |
|----------|--------|----------------------------------------------------------------|------------------------------------------------------------------------------------|----------------------|
| CIP      | 332.13 | C <sub>17</sub> H <sub>18</sub> FN <sub>3</sub> O <sub>3</sub> | 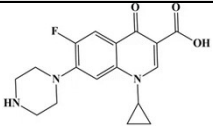 | 2.91                 |

**Table S5.** Partial information on CIP and its analogs.

|    |        |                       |                                                                                      |       |
|----|--------|-----------------------|--------------------------------------------------------------------------------------|-------|
| P1 | 334.11 | $C_{16}H_{16}FN_3O_4$ | 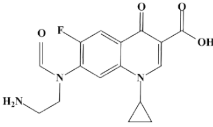   | 2.586 |
| P2 | 350.08 | $C_{17}H_{20}FN_3O_4$ |    | 2.724 |
| P3 | 334.11 | $C_{16}H_{19}N_3O_5$  |    | 2.586 |
| P4 | 263.08 | $C_{13}H_{11}N_2O_3F$ |    | 3.701 |
| P5 | 237.08 | $C_{11}H_{10}N_2O_4$  |    | 1.215 |
| P6 | 283.09 | $C_{12}H_{11}FN_2O_5$ |    | 1.215 |
| P7 | 285.07 | $C_{16}H_{15}N_3O_2$  |  | 3.703 |
| P8 | 184.02 | $C_8H_6FNO_3$         |  | 1.216 |

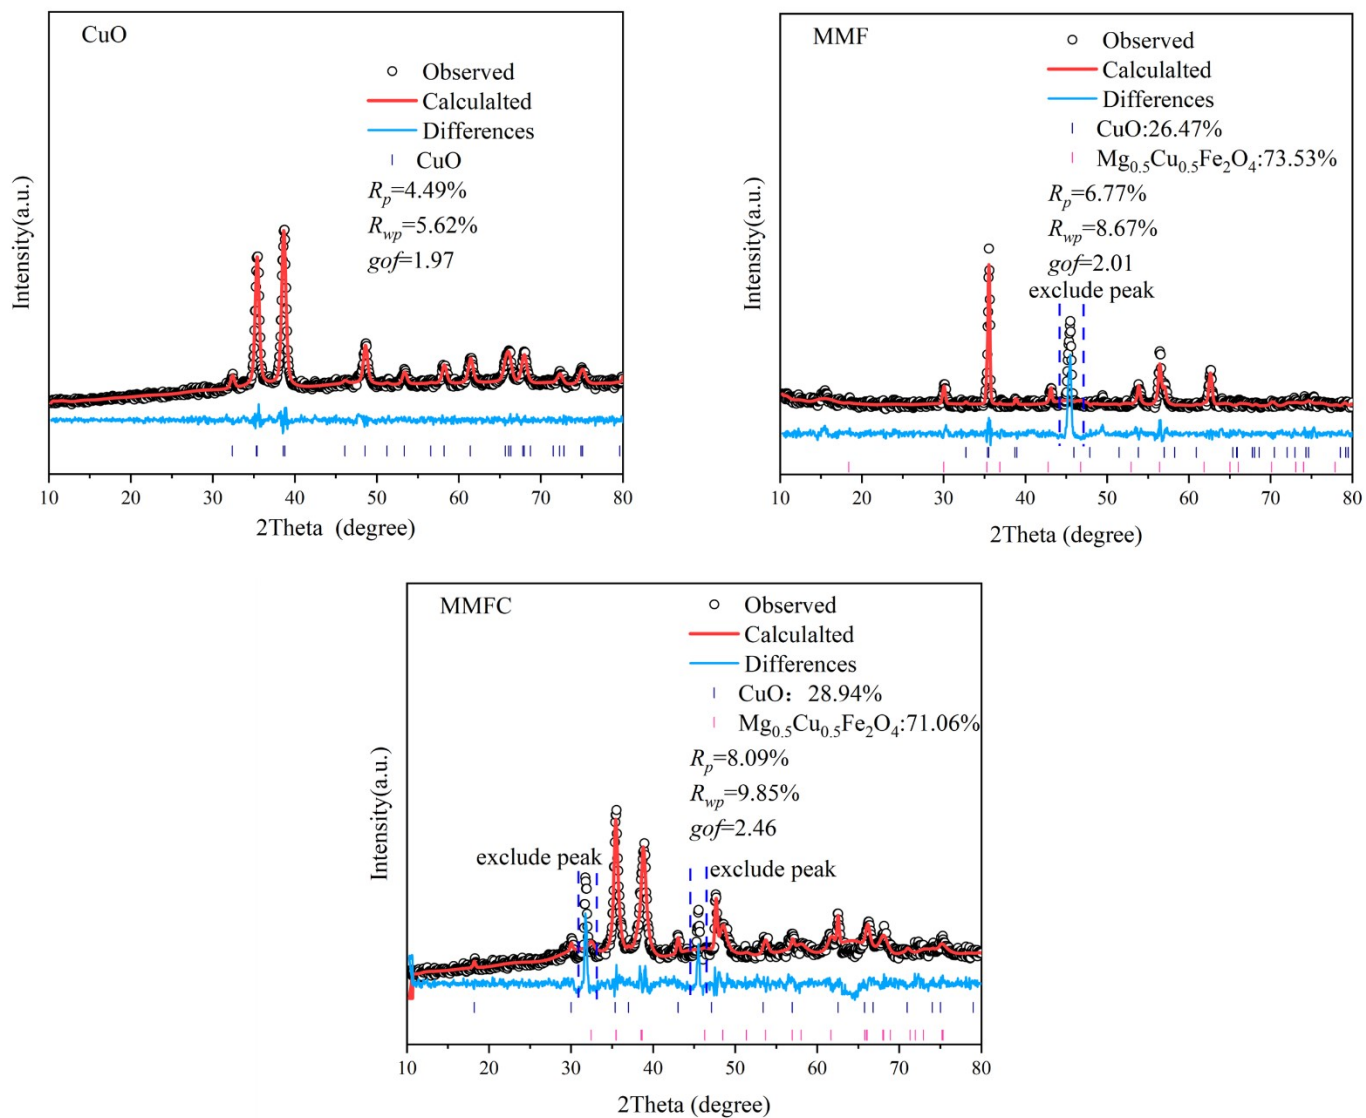

**Fig. S1:** XRD pattern refinements using the Rietveld method of CuO, MMF and MMFC.



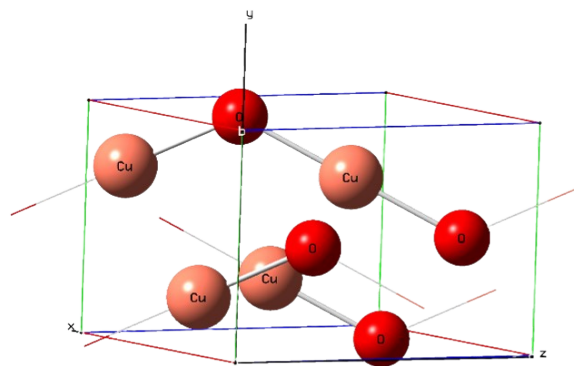

**Fig. S2:** The unit cell structure of CuO

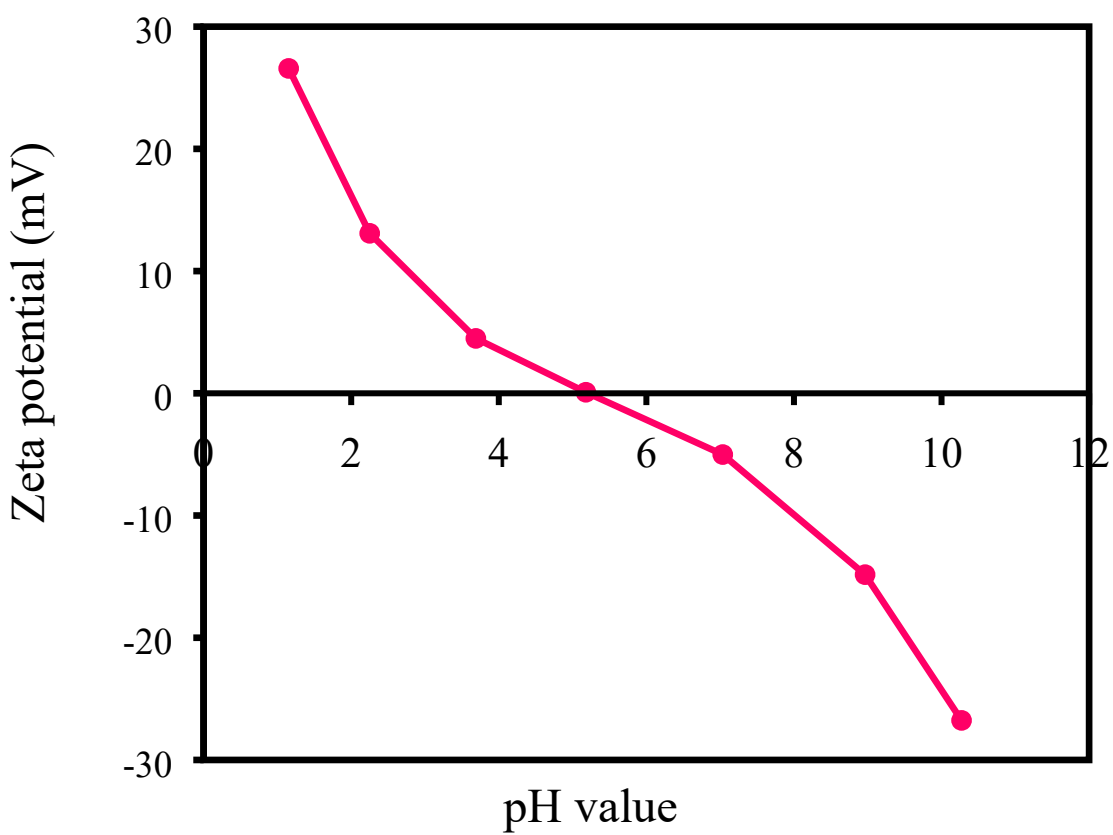

**Fig. S3.** Zeta potential of MMFC in the pH range of 1.0-11.0.

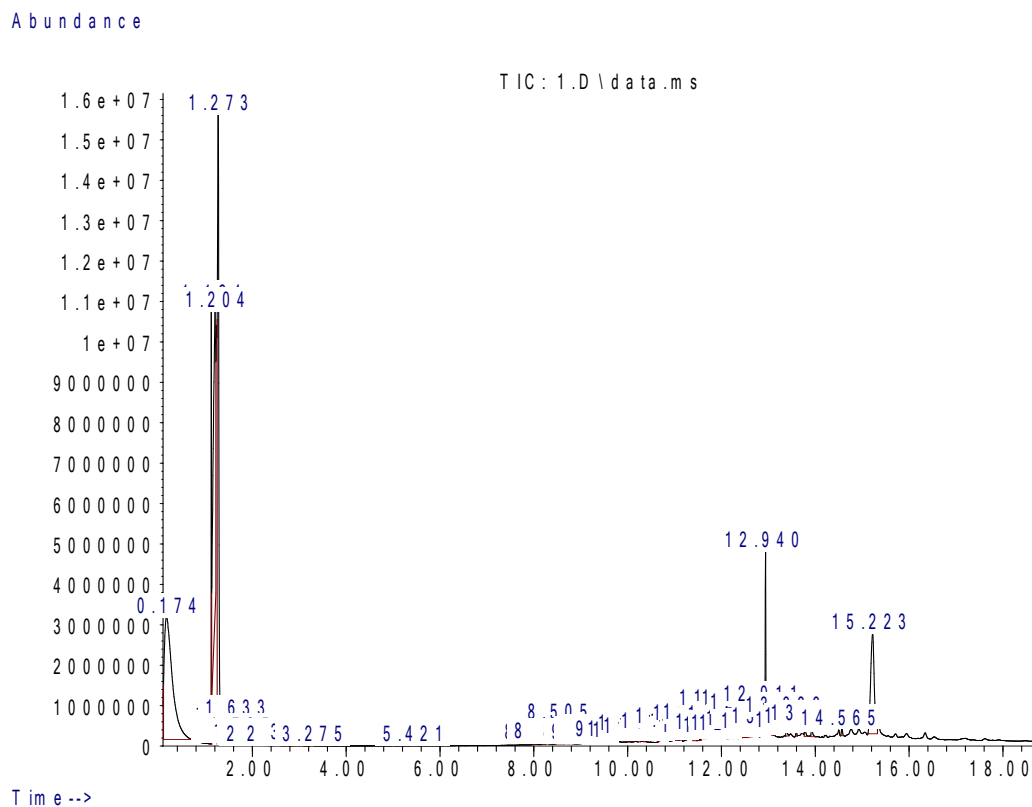

**Fig. S4:** MS spectra of CIP degradation intermediates obtained by the GC-MS method.
